# Supplementary material for: Iodized Salt in Cambodia: Trends from 2008 to 2014
Source: MDPI journal article supplement (doi:10.3390/nu7064189), 2015-05-29
Supplement: s1 [file s1]

# Supplementary Information:

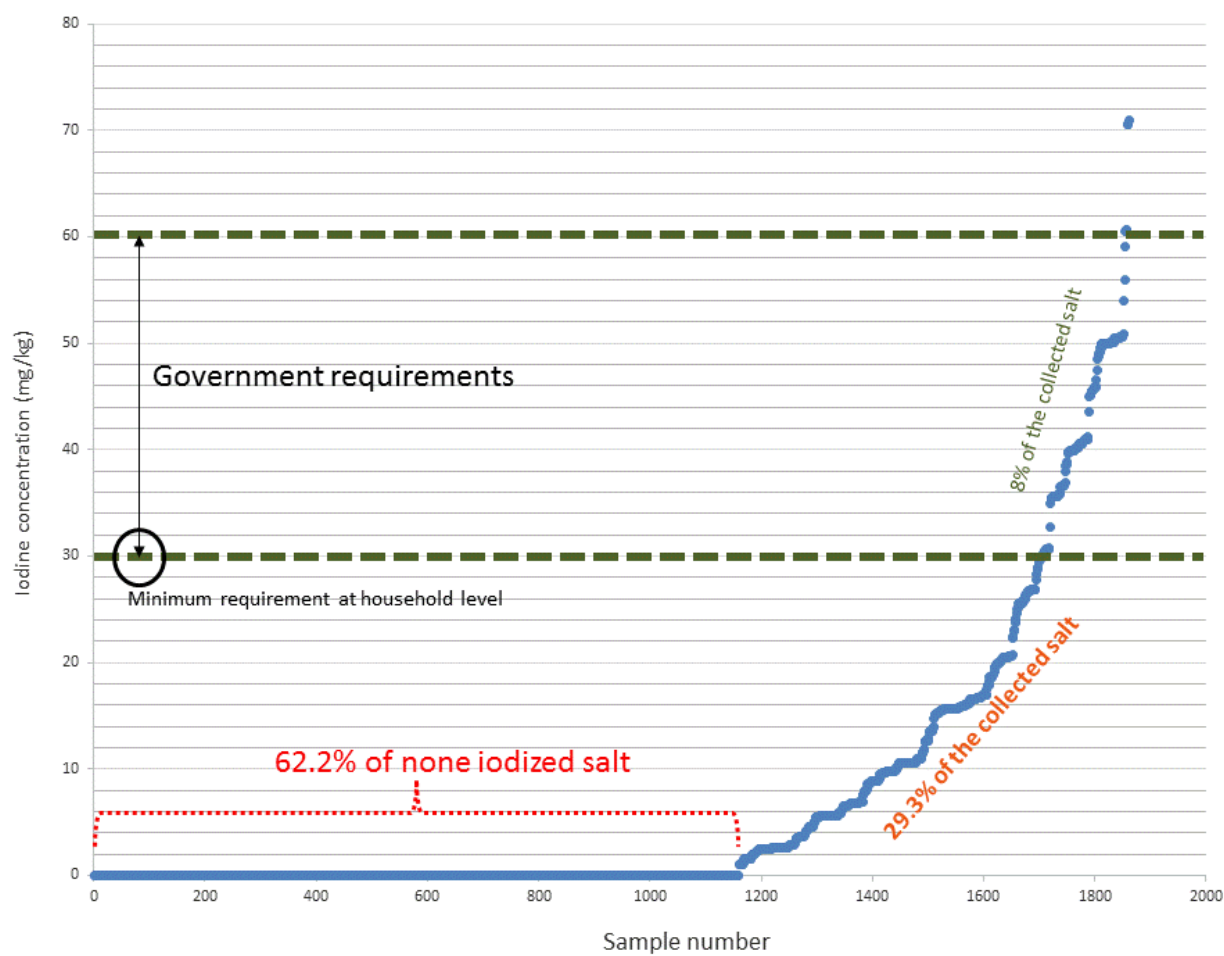

**Supplementary Figure.** 2014 Iodine values (mg/kg) in all salt (sorted by lowest to highest iodine value).
